# Supplementary material
Source: publisher site journal article supplement (https://www.dovepress.com/article/591808)
Supplement: Supplementary file 1 [file 591808%20Revised%20Supplementary%20Material.pdf]

**Table S1** Baseline characteristics of included and excluded participants.

| Variables                            | Included(n=52)       | Excluded(n=56)     | P     |
|--------------------------------------|----------------------|--------------------|-------|
| Age, in years                        | 31.25±7.48           | 30.25±5.93         | 0.441 |
| Sex (M/F), %                         | 13/39                | 12/44              | 0.820 |
| BMI, kg/m <sup>2</sup>               | 37.69±4.82           | 37.75±5.51         | 0.950 |
| Systolic blood pressure, mmHg        | 133(125,149.5)       | 135(125.25,146.75) | 0.883 |
| Diastolic blood pressure, mmHg       | 83.5(75.25,90.75)    | 80(77,90.75)       | 0.721 |
| Hypertension, %                      | 40%(21/52)           | 45%(25/56)         | 0.700 |
| TC, mmol/L                           | 4.73±0.78            | 5.00±1.03          | 0.141 |
| TG, mmol/L                           | 1.96(1.29,2.68)      | 1.89(1.31,2.98)    | 0.822 |
| HDL, mmol/L                          | 1.25±0.21            | 1.29±0.22          | 0.401 |
| LDL, mmol/L                          | 2.98±0.68            | 3.08±0.76          | 0.409 |
| Hyperlipidemia, %                    | 65.3% (34/52)        | 11.5%(34/56)       | 0.692 |
| HbA1c, %                             | 5.6 (5.4, 6.38)      | 5.65(5.4,6.35)     | 0.690 |
| Glucose, mmol/L                      | 5.61(4.87, 6.38)     | 5.59(5.18,6.26)    | 0.422 |
| Diabetes, %                          | 25% (13/52)          | 27% (15/56)        | 1.000 |
| MS, %                                | 46.1% (24/52)        | 54% (30/56)        | 0.564 |
| TFA, cm <sup>2</sup>                 | 632.87±149.52        | 603.81±128.30      | 0.280 |
| VFA, cm <sup>2</sup>                 | 230.38±77.60         | 217.94±78.59       | 0.410 |
| SFA, cm <sup>2</sup>                 | 402.49±120.62        | 385.87±98.12       | 0.432 |
| LF, %                                | 20.58±7.41           | 21.32±9.64         | 0.659 |
| PF, %                                | 20.45 (16.15, 30.13) | 21(17.78, 25.05)   | 0.875 |
| SMI, cm <sup>2</sup> /m <sup>2</sup> | 64.72±10.96          | 63.24±13.81        | 0.635 |
| PMFC, %                              | 7.9 (6.02, 10.32)    | 7.25(5.75, 8.8)    | 0.245 |

**Note:** Descriptive statistics were expressed as mean±standard deviation or median (interquartilerange).

**Abbreviations:** BMI, body mass index; TC, total cholesterol; TG, triglyceride; HDL, high-density lipoprotein; LDL, low-density lipoprotein; MS; metabolic syndrome; TFA, total fat area; VFA, visceral fat area; SFA, subcutaneous fat area; SMI, skeletal muscle index; LF, liver fat; PF, pancreas fat; PMFC, postvertebral muscle fat content.

**Table S2** Consistency assessment based on QCT body composition measurement

|      | <b>ICC</b> | <b>95%CI</b> |
|------|------------|--------------|
| TFA  | 0.997      | 0.994–0.999  |
| VFA  | 0.989      | 0.910–0.997  |
| SFA  | 0.989      | 0.957–0.996  |
| SMA  | 0.962      | 0.906–0.985  |
| LF   | 0.927      | 0.819–0.971  |
| PF   | 0.913      | 0.783–0.965  |
| PMFC | 0.923      | 0.810–0.969  |

**Abbreviations:** QCT, quantitative computed tomography; ICC, intraclass correlation coefficient; CI, confidence interval; TFA, total fat area; VFA, visceral fat area; SFA, subcutaneous fat area; SMA, skeletal muscle area; LF, liver fat; PF, pancreas fat; PMFC, postvertebral muscle fat content.

**Table S3** Correlations between BMI, body composition, and Laboratory parameters in obese patients with MS before LSG

|      |                         | TC     | TG     | HDL          | LDL          | HbA1c  | Glucose      |
|------|-------------------------|--------|--------|--------------|--------------|--------|--------------|
| BMI  | Correlation coefficient | 0.137  | 0.127  | -0.164       | 0.13         | -0.078 | -0.05        |
|      | p value                 | 0.525  | 0.554  | 0.445        | 0.546        | 0.717  | 0.815        |
| TFA  | Correlation coefficient | 0.108  | 0.143  | 0.02         | <b>.406</b>  | -0.04  | 0.18         |
|      | p value                 | 0.616  | 0.504  | 0.924        | <b>0.049</b> | 0.853  | 0.399        |
| VFA  | Correlation coefficient | 0.177  | 0.366  | -0.136       | 0.12         | -0.012 | -0.08        |
|      | p value                 | 0.408  | 0.079  | 0.527        | 0.576        | 0.955  | 0.712        |
| SFA  | Correlation coefficient | -0.14  | 0.009  | -0.051       | 0.172        | 0.077  | <b>.422</b>  |
|      | p value                 | 0.514  | 0.968  | 0.815        | 0.421        | 0.722  | <b>0.04</b>  |
| SMI  | Correlation coefficient | -0.016 | 0.23   | <b>-.488</b> | 0.061        | -0.082 | -0.354       |
|      | p value                 | 0.941  | 0.279  | <b>0.016</b> | 0.778        | 0.702  | 0.09         |
| LF   | Correlation coefficient | 0.234  | 0.16   | 0.09         | 0.232        | -0.025 | <b>.415</b>  |
|      | p value                 | 0.271  | 0.455  | 0.677        | 0.275        | 0.907  | <b>0.044</b> |
| PF   | Correlation coefficient | 0.134  | 0.097  | <b>-.542</b> | -0.017       | -0.301 | -0.258       |
|      | p value                 | 0.534  | 0.654  | <b>0.006</b> | 0.936        | 0.154  | 0.224        |
| PMFC | Correlation coefficient | 0.159  | -0.336 | 0.216        | 0.25         | -0.347 | -0.054       |
|      | p value                 | 0.459  | 0.108  | 0.31         | 0.239        | 0.096  | 0.802        |

**Notes:** Bolded numbers indicate statistical significance.

**Abbreviations:** LSG, laparoscopic sleeve gastrectomy; MS, metabolic syndrome; TC, total cholesterol; TG, triglyceride; HDL, high-density lipoprotein; LDL, low-density lipoprotein; MS; metabolic syndrome; TFA, total fat area; VFA, visceral fat area; SFA, subcutaneous fat area; SMI, skeletal muscle index; LF, liver fat; PF, pancreas fat; PMFC, postvertebral muscle fat content.

**Table S4** Correlations between BMI, body composition, and laboratory parameters in obese patients without MS before LSG

|      |                         | TC            | TG            | HDL    | LDL    | HbA1c  | Glucose |
|------|-------------------------|---------------|---------------|--------|--------|--------|---------|
| BMI  | Correlation coefficient | -0.296        | -0.343        | -0.151 | -0.16  | -0.175 | -0.238  |
|      | p value                 | 0.126         | 0.074         | 0.442  | 0.415  | 0.372  | 0.223   |
| TFA  | Correlation coefficient | -0.351        | <b>-0.422</b> | -0.129 | -0.252 | 0.049  | -0.234  |
|      | p value                 | 0.067         | <b>0.025</b>  | 0.514  | 0.197  | 0.804  | 0.231   |
| VFA  | Correlation coefficient | -0.038        | -0.126        | -0.325 | -0.005 | -0.015 | -0.196  |
|      | p value                 | 0.848         | 0.522         | 0.091  | 0.979  | 0.939  | 0.317   |
| SFA  | Correlation coefficient | <b>-0.411</b> | <b>-0.423</b> | 0.05   | -0.312 | -0.01  | -0.22   |
|      | p value                 | <b>0.03</b>   | <b>0.025</b>  | 0.801  | 0.106  | 0.958  | 0.26    |
| SMI  | Correlation coefficient | -0.166        | 0.076         | -0.328 | -0.009 | -0.165 | -0.283  |
|      | p value                 | 0.399         | 0.702         | 0.088  | 0.965  | 0.402  | 0.145   |
| LF   | Correlation coefficient | 0.079         | -0.12         | -0.267 | 0.175  | -0.195 | -0.267  |
|      | p value                 | 0.688         | 0.544         | 0.17   | 0.372  | 0.321  | 0.17    |
| PF   | Correlation coefficient | 0.119         | -0.074        | -0.048 | 0.073  | 0.284  | -0.095  |
|      | p value                 | 0.548         | 0.708         | 0.808  | 0.713  | 0.144  | 0.631   |
| PMFC | Correlation coefficient | -0.106        | -0.221        | 0.08   | -0.188 | 0.273  | 0.091   |
|      | p value                 | 0.592         | 0.258         | 0.684  | 0.337  | 0.16   | 0.645   |

**Notes:** Bolded numbers indicate statistical significance.

**Abbreviations:** LSG, laparoscopic sleeve gastrectomy; MS, metabolic syndrome; TC, total cholesterol; TG, triglyceride; HDL, high-density lipoprotein; LDL, low-density lipoprotein; MS; metabolic syndrome; TFA, total fat area; VFA, visceral fat area; SFA, subcutaneous fat area; SMI, skeletal muscle index; LF, liver fat; PF, pancreas fat; PMFC, postvertebral muscle fat content.

**Table S5** Correlation analysis of BMI and body composition change rates with laboratory indicators following LSG in MS patients

|       |                         | ΔTC    | ΔTG    | ΔHDL   | ΔLDL   | ΔHbA1c | ΔGlucose     |
|-------|-------------------------|--------|--------|--------|--------|--------|--------------|
| ΔBMI  | Correlation coefficient | -0.282 | 0.012  | -0.227 | -0.087 | -0.24  | 0.203        |
|       | p value                 | 0.182  | 0.955  | 0.286  | 0.686  | 0.258  | 0.34         |
| ΔTFA  | Correlation coefficient | -0.119 | -0.253 | 0.15   | 0.073  | -0.08  | 0.272        |
|       | p value                 | 0.579  | 0.233  | 0.485  | 0.734  | 0.712  | 0.198        |
| ΔVFA  | Correlation coefficient | -0.021 | 0.005  | -0.09  | 0.18   | 0.03   | 0.309        |
|       | p value                 | 0.923  | 0.981  | 0.674  | 0.4    | 0.888  | 0.142        |
| ΔSFA  | Correlation coefficient | -0.191 | -0.357 | 0.226  | 0.02   | -0.212 | 0.298        |
|       | p value                 | 0.371  | 0.087  | 0.288  | 0.926  | 0.32   | 0.157        |
| ΔSMI  | Correlation coefficient | -0.174 | 0.065  | 0.048  | -0.058 | 0.056  | -0.003       |
|       | p value                 | 0.416  | 0.762  | 0.824  | 0.787  | 0.795  | 0.99         |
| ΔLF   | Correlation coefficient | 0.11   | -0.098 | 0.368  | 0.151  | 0.025  | <b>.414</b>  |
|       | p value                 | 0.61   | 0.648  | 0.077  | 0.48   | 0.907  | <b>0.044</b> |
| ΔPF   | Correlation coefficient | -0.342 | -0.17  | -0.086 | -0.402 | 0.361  | 0.233        |
|       | p value                 | 0.102  | 0.426  | 0.689  | 0.052  | 0.083  | 0.273        |
| ΔPMFC | Correlation coefficient | 0.383  | -0.033 | 0.28   | 0.226  | -0.284 | -0.113       |
|       | p value                 | 0.064  | 0.878  | 0.185  | 0.288  | 0.179  | 0.599        |

**Notes:** Bolded numbers indicate statistical significance.

**Abbreviations:** LSG, laparoscopic sleeve gastrectomy; MS; metabolic syndrome; TC, total cholesterol; TG, triglyceride; HDL, high-density lipoprotein; LDL, low-density lipoprotein; TFA, total fat area; VFA, visceral fat area; SFA, subcutaneous fat area; SMI, skeletal muscle index; LF, liver fat; PF, pancreas fat; PMFC, postvertebral muscle fat content.  $\Delta$ Body composition = (preoperative Body composition - postoperative Body composition) / preoperative Body composition;  $\Delta$ BMI = (preoperative BMI - postoperative BMI) / preoperative BMI;  $\Delta$ Laboratory indicators = (preoperative Laboratory indicators - postoperative Laboratory indicators) / preoperative Laboratory indicators.

**Table S6** Correlation analysis of BMI and body composition change rates with laboratory indicators following LSG in Non-MS patients

|               |                         | $\Delta$ TC | $\Delta$ TG  | $\Delta$ HDL | $\Delta$ LDL | $\Delta$ HbA1c | $\Delta$ Glucose |
|---------------|-------------------------|-------------|--------------|--------------|--------------|----------------|------------------|
| $\Delta$ BMI  | Correlation coefficient | 0.241       | <b>.427</b>  | -0.024       | <b>.480</b>  | -0.157         | 0.205            |
|               | p value                 | 0.216       | <b>0.023</b> | 0.903        | <b>0.01</b>  | 0.426          | 0.295            |
| $\Delta$ TFA  | Correlation coefficient | -0.314      | 0.119        | -0.306       | -0.038       | 0.05           | 0.132            |
|               | p value                 | 0.103       | 0.545        | 0.113        | 0.847        | 0.801          | 0.502            |
| $\Delta$ VFA  | Correlation coefficient | -0.344      | -0.122       | -0.25        | -0.122       | -0.079         | -0.055           |
|               | p value                 | 0.073       | 0.538        | 0.2          | 0.538        | 0.691          | 0.782            |
| $\Delta$ SFA  | Correlation coefficient | -0.183      | 0.296        | -0.222       | 0.071        | 0.081          | 0.223            |
|               | p value                 | 0.35        | 0.126        | 0.256        | 0.721        | 0.683          | 0.253            |
| $\Delta$ SMI  | Correlation coefficient | -0.265      | -0.106       | -0.074       | -0.17        | 0.259          | -0.308           |
|               | p value                 | 0.172       | 0.591        | 0.707        | 0.388        | 0.184          | 0.111            |
| $\Delta$ LF   | Correlation coefficient | 0.182       | 0.208        | 0.067        | 0.22         | 0.26           | 0.076            |
|               | p value                 | 0.355       | 0.288        | 0.736        | 0.261        | 0.182          | 0.7              |
| $\Delta$ PF   | Correlation coefficient | -0.061      | 0.135        | -0.078       | -0.104       | 0.242          | 0.309            |
|               | p value                 | 0.757       | 0.493        | 0.692        | 0.598        | 0.215          | 0.109            |
| $\Delta$ PMFC | Correlation coefficient | -0.24       | -0.355       | 0.367        | -0.182       | 0.304          | -0.281           |
|               | p value                 | 0.218       | 0.064        | 0.055        | 0.353        | 0.116          | 0.147            |

**Notes:** Bolded numbers indicate statistical significance.

**Abbreviations:**LSG, laparoscopic sleeve gastrectomy; MS; metabolic syndrome; TC, total cholesterol; TG, triglyceride; HDL, high-density lipoprotein; LDL, low-density lipoprotein; TFA, total fat area; VFA, visceral fat area;SFA, subcutaneous fat area; SMI, skeletal muscle index; LF, liver fat; PF, pancreas fat; PMFC, postvertebral muscle fat content. $\Delta$ Body composition = (preoperative Body composition– postoperative Body composition) / preoperative Body composition;  $\Delta$ BMI = (preoperative BMI– postoperative BMI) / preoperative BMI;  $\Delta$ Laboratory indicators = (preoperative Laboratory indicators– postoperative Laboratory indicators) / preoperative Laboratory indicators.
